# Supplementary material
Source: publisher site journal article supplement (https://www.dovepress.com/article/330225)
Supplement: Supplementary file 1 [file get_supplementary_file.php]

**Spplementary File 1: Supportive Care Needs scale for Patients with Tuberculosis (draft)**

Introductions: “Supportive care needs” refers to requirements for care that enables management of symptoms and side effects, adaptation and coping, facilitates understanding and informs decision making during treatment. Please select the answer that best suits you for each of the following descriptions according to your actual situation (There is no right or wrong answer to these questions).

| Items | No need-not applicable | No need-already satisfied | Low need | Moderate need | High need |
| --- | --- | --- | --- | --- | --- |
| 1.Help me have a healthy diet and improved nutrition during illness. |  |  |  |  |  |
| 2.Teach me to how to perform appropriate daily exercises. |  |  |  |  |  |
| 3.Help me to prevent or manage side effects (e.g., joint pain, decreased hearing, and impaired vision). |  |  |  |  |  |
| 4.Teach me to relieve physical discomfort (e.g., fever, cough, night sweats). |  |  |  |  |  |
| 5.Remind and instruct me to attend physical examinations on time. |  |  |  |  |  |
| 6.Help me to protect my privacy during treatment. |  |  |  |  |  |
| 7.Help me to cope with negative emotions (e.g., anxiety, fear) and relieve psychological stress. |  |  |  |  |  |
| 8.Help me to engage in healthcare to build confidence in rehabilitation. |  |  |  |  |  |
| 9.Help me to build a positive attitude towards future life. |  |  |  |  |  |
| 10.Teach me to cope with family-related issues caused by illness (e.g., getting married and having children). |  |  |  |  |  |
| 11.Help me to obtain information about TB (e.g., symptoms, transmission routes). |  |  |  |  |  |
| 12.Help me to understand my condition and test results. |  |  |  |  |  |
| 13.Help me to understand the name of the medication, ways of taking it and precautions. |  |  |  |  |  |
| 14.Help me to obtain information about the schedule of treatment after discharge |  |  |  |  |  |
| 15.Help me to know more about the treatment protocol and prognosis of the disease. |  |  |  |  |  |
| 16.Help me to communicate with peer patients who have had similar experiences. |  |  |  |  |  |
| 17.Teach me to obtain understanding and support from family and friends. |  |  |  |  |  |
| 18.Help me to participate in support groups and activities. |  |  |  |  |  |
| 19.Teach me to cope with challenges related to changes in social interactions after diagnosis. |  |  |  |  |  |
| 20.Teach me to take effective measures to protect others from being infected. |  |  |  |  |  |
| 21.Help me to obtain information about TB policies related to treatment fee decreases or waivers. |  |  |  |  |  |
| 22.Help me to know the expenses of treatment. |  |  |  |  |  |
| 23.Teach me to obtain timely and professional follow-up services after discharge. |  |  |  |  |  |
| 24.Help me to learn and develop a healthy lifestyle. |  |  |  |  |  |
| 25.Help me to establish a stable, long-term connection with healthcare providers. |  |  |  |  |  |
